# Supplementary material
Source: PubMed Central journal article supplement (PMC4027054)
Supplement: NIHMS532581-supplement-1_si_001.pdf [file NIHMS532581-supplement-1_si_001.pdf]

# Supporting Information

## Clicking 3'-azidothymidine into novel potent inhibitors of human immunodeficiency virus

*Venkata Ramana Sirivolu<sup>a§</sup>, Sanjeev Kumar V. Vernekar<sup>a§</sup>, Tatiana Ilina<sup>b</sup>, Nataliya S.*

*Myshakina, Michael A. Parniak<sup>b</sup> and Zhengqiang Wang<sup>\*a</sup>*

<sup>a</sup> Center for Drug Design, Academic Health Center, University of Minnesota, Minneapolis, MN 55455

<sup>b</sup> Department of Microbiology & Molecular Genetics, University of Pittsburgh School of Medicine, Pittsburgh, PA 15219, USA

### Table of contents

|                                                 |       |
|-------------------------------------------------|-------|
| Synthesis of propargyl aryl ethers from phenols | S2-S3 |
| Synthesis of aromatic alkyne from aldehyde      | S4    |

**General procedure for the synthesis of propargyl aryl ethers from phenols.** To a stirred solution of phenol (1.0 equiv.) in DMF were added  $K_2CO_3$  (2.0 equiv.) and propargyl bromide (1.5 equiv.) in DMF at room temperature. The mixture was stirred at room temperature for 12-15h. Solvent was evaporated and water was added and extracted with ethyl acetate. The combined extracts were dried over  $Na_2SO_4$  and concentrated to get crude product. The crude product was purified by column chromatography, eluted with 10-15% EtOAc in hexane, yielded the desired propargyl aryl ethers.

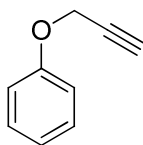

**(Prop-2-yn-1-yloxy)benzene (7a).** Prepared from phenol, yielded (prop-2-yn-1-yloxy)benzene **7a** (76%) as a oil.  $^1H$  NMR (600 MHz,  $CDCl_3$ )  $\delta$  7.28–7.39 (m, 2H), 6.85–6.98 (m, 3H), 4.65 (s, 2H), 2.48 (s, 1H).

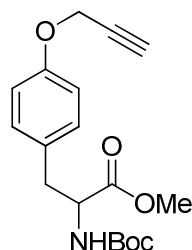

**Methyl 2-((tert-butoxycarbonyl)amino)-3-(4-(prop-2-yn-1-yloxy)phenyl)propanoate (7b).** Prepared from methyl 2-((tert-butoxycarbonyl)amino)-3-(4-hydroxyphenyl)propanoate, yielded methyl 2-((tert-butoxycarbonyl)amino)-3-(4-(prop-2-yn-1-yloxy)phenyl)propanoate **7b** (60%) as a oil.  $^1H$  NMR (600 MHz,  $CDCl_3$ )  $\delta$  7.04 (d,  $J = 9.0$  Hz, 2H), 6.88 (d,  $J = 9.0$  Hz, 2H), 4.97 (d,  $J = 8.0$  Hz, 1H), 4.65 (d,  $J = 2.4$  Hz, 2H), 4.52-4.57 (m, 1H), 3.72 (s, 3H), 2.98-3.10 (m, 1H), 2.49 (t,  $J = 2.6$  Hz, 1H), 1.41 (s, 9H).

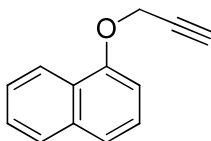

**1-(Prop-2-yn-1-yloxy)naphthalene (7c).** Prepared from naphthalen-1-ol, yielded 1-(prop-2-yn-1-yloxy)naphthalene **7c** (75%) as a solid.  $^1H$  NMR (600 MHz,  $CDCl_3$ )  $\delta$  8.34-8.26 (m, 1H), 7.82 (dt,  $J = 4.0$ ,  $J = 3.0$  Hz, 1H), 7.50-7.52 (m, 3H), 7.42 (t,  $J = 7.9$  Hz, 1H), 6.96 (d,  $J = 7.6$  Hz, 1H), 4.91 (d,  $J = 2.4$  Hz, 2H), 2.56 (t,  $J = 2.3$  Hz, 1H).

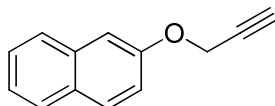

**2-(Prop-2-yn-1-yloxy)naphthalene (7d).** Prepared from naphthalen-2-ol, yielded 2-(Prop-2-yn-1-yloxy)naphthalene **7d** (70%) as a pale yellow solid.  $^1\text{H NMR}$  (600 MHz,  $\text{CDCl}_3$ )  $\delta$  7.71-7.67 (m, 3H), 7.40-7.36 (m, 1H), 7.29-7.27 (m, 1H), 7.17 (d,  $J = 2.5$  Hz, 1H), 7.11 (dd,  $J = 2.6$  Hz,  $J = 9.0$  Hz, 1H), 4.74 (d,  $J = 2.4$  Hz, 2H), 2.47 (t,  $J = 2.4$  Hz, 1H).

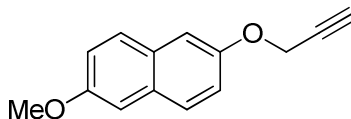

**2-Methoxy-6-(prop-2-yn-1-yloxy)naphthalene (7e).** Prepared from 6-methoxynaphthalen-2-ol, yielded 2-methoxy-6-(prop-2-yn-1-yloxy)naphthalene **7e** (74%) as a solid, confirmed by NMR.

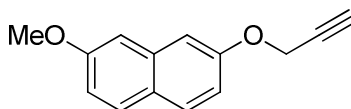

**2-Methoxy-7-(prop-2-yn-1-yloxy)naphthalene (7f).** Prepared from 7-methoxynaphthalen-2-ol, yielded 2-methoxy-7-(prop-2-yn-1-yloxy)naphthalene **7f** (72%) as a brown solid.  $^1\text{H NMR}$  (600 MHz,  $\text{CDCl}_3$ )  $\delta$  7.62-7.69 (m, 2H), 7.18 (s, 1H), 6.96-7.12 (m, 3H), 4.78 (s, 2H), 3.94 (s, 3H), 2.56 (s, 1H).

**Dimethyl 2-Oxopropylphosphonate (11)** To a stirred suspension of KI (82.0 g, 490 mmol) in acetone (100 mL) and MeCN (125 mL) was added chloroacetone **10** (45.0 g, 490 mmol). Stirring was continued for 1 h at room temperature. Trimethyl phosphite (58.0 mL, 490 mmol) was slowly added. After 12 h at room temperature, the mixture was heated to 50 °C to ensure complete conversion. Filtration through a pad of celite and evaporation of the solvents under reduced pressure yielded the crude product. The crude product was further purified by flash column chromatography (EtOAc/hexane 1:1) furnished the product **11** (41.0 g, 353 mmol, 72%) as a colorless liquid.  $^1\text{H NMR}$  (600 MHz,  $\text{CDCl}_3$ )  $\delta$  3.78 (d,  $J = 11.0$  Hz, 6H), 3.07 (d,  $J = 22.8$  Hz, 2H), 2.29 (s, 3H).

**Tosyl azide (13)** Tosylchloride (5.72 g, 26.0 mmol) was dissolved in acetone (85 mL) and water (85 mL). The solution was cooled in ice-bath and  $\text{NaN}_3$  (1.71 g, 26.0 mmol) was added. The reaction was stirred for 2 h at the same temperature, then 12 h at room temperature. The acetone was removed under vacuum and the remaining water layer was extracted with EtOAc (2 x 50 mL). The EtOAc layer was dried over  $\text{Na}_2\text{SO}_4$ , filtered and concentrated. The intermediate tosyl azide was obtained as a white solid **13** (4.8 g, 24.3 mmol, 94%).  $^1\text{H NMR}$  (600 MHz,  $\text{CDCl}_3$ )  $\delta$  7.83 (d,  $J = 8.4$  Hz, 2H), 7.39 (d,  $J = 8.4$  Hz, 2H), 2.46 (s, 3H).

**Dimethyl 1-Diazo-2-oxopropylphosphonate (14)** To a stirred suspension of NaH (0.56 g, 60 % w/w, 23.2 mmol) in THF/ benzene (1:4, 70 mL) was added a solution of dimethyl (2-oxopropyl)-phosphonate (3.5 g, 21.1 mmol) in dry benzene (15 mL) at 0 °C. A white solid was formed and the stirring was continued for 1 h. A solution of tosylazide (4.3 g, 21.8 mmol) in dry benzene (10 mL) was added. The mixture was stirred overnight at room temperature, and then filtered through a pad of celite and evaporation of the solvents under reduced pressure yielded the crude product. The crude product was further purified by flash column chromatography

(EtOAc/hexane 1:1) furnished the product **14** (2.6 g, 13.3 mmol, 65%) as a colorless liquid.  $^1\text{H}$  NMR (600 MHz,  $\text{CDCl}_3$ )  $\delta$  3.85 (d,  $J = 11.8$  Hz, 6H), 2.28 (s, 3H).

**General procedure for the synthesis of aromatic alkyne from aldehyde.** To a stirred solution of aldehyde (1.0 equiv.) in MeOH were added Bestmann reagent (1.1 equiv.) in MeOH and  $\text{K}_2\text{CO}_3$  (3.0 equiv.) at room temperature. The mixture was stirred at room temperature for 12 h. Solvent was evaporated and saturated aqueous  $\text{NH}_4\text{Cl}$  solution was added and extracted with ethyl acetate. The combined extracts were dried over  $\text{MgSO}_4$  and concentrated to get crude product. The crude product was purified by column chromatography, eluted with 10-20% EtOAc in hexane, yielded the desired aromatic alkyne.

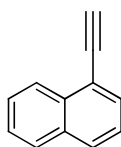

**1-Ethynynaphthalene (16a).** Prepared from 1-naphthaldehyde, yielded 1-ethynynaphthalene **16a** (90%) as a brown oil.  $^1\text{H}$  NMR (600 MHz,  $\text{CDCl}_3$ )  $\delta$  8.36-8.38 (m, 1H), 7.86 (d,  $J = 7.7$  Hz, 2H), 7.75-7.53 (m, 1H), 7.60-7.51 (m, 2H), 7.44-7.41 (m, 1H), 3.48 (s, 1H).

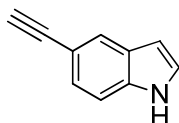

**5-Ethynyl-1H-indole (16b).** Prepared from 1H-indole-5-carbaldehyde, yielded 5-ethynyl-1H-indole **16b** (81%) as a solid.  $^1\text{H}$  NMR (600 MHz,  $\text{CDCl}_3$ )  $\delta$  8.20 (s, 1H), 7.82 (s, 1H), 7.30-7.34 (m, 2H), 7.21 (dd,  $J = 2.6$ ,  $J = 3.2$  Hz, 1H), 6.52 (dd,  $J = 2.1$ ,  $J = 3.0$  Hz, 1H), 2.98 (s, 1H).

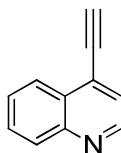

**4-Ethynylquinoline (16c).** Prepared from quinoline-4-carbaldehyde, yielded 4-ethynylquinoline **16c** (45%).  $^1\text{H}$  NMR (600 MHz,  $\text{CDCl}_3$ )  $\delta$  8.87 (d,  $J = 4.6$  Hz, 1H), 8.27 (dd,  $J = 8.6$  Hz,  $J = 1.6$  Hz, 1H), 8.11 (dd,  $J = 8.3$  Hz,  $J = 1.6$  Hz, 1H), 7.74 (ddd,  $J = 8.6$  Hz,  $J = 6.7$  Hz,  $J = 1.6$  Hz, 1H), 7.60-7.63 (m, 1H), 7.53 (d,  $J = 4.5$  Hz, 1H), 3.67 (s, 1H).
